# Supplementary material for: Risks of seasonal extreme rainfall events in Bangladesh under 1.5 and 2.0degrees’ warmer worlds – How anthropogenic aerosols change the story
Source: Copernicus journal article supplement (doi:10.5194/hess-2018-400), 2018-09-10
Supplement: Supplementary file 1 [file hess-2018-400-supplement.pdf]

## Supplement of

# “Risks of seasonal extreme rainfall events in Bangladesh under 1.5 and 2.0 degrees’ warmer worlds – How anthropogenic aerosols change the story”

Ruksana H. Rimi et al.

5 *Correspondence to:* Ruksana H. Rimi ([ruksana.rimi@ouce.ox.ac.uk](mailto:ruksana.rimi@ouce.ox.ac.uk))

Table S1: Basic information about the two observation datasets

| Product Name | Product version           | Spatial Resolution | Time Scale | Source/reference                                                                                                                                                                                                                                                   |
|--------------|---------------------------|--------------------|------------|--------------------------------------------------------------------------------------------------------------------------------------------------------------------------------------------------------------------------------------------------------------------|
| APHRODITE    | Monsoon Asia (MA) V1003R1 | 0.5°X 0.5°         | 1951-2007  | Yatagai et al., 2012. Available at: <a href="http://journals.ametsoc.org/doi/pdf/10.1175/BAMS-D-11-00122.1">http://journals.ametsoc.org/doi/pdf/10.1175/BAMS-D-11-00122.1</a>                                                                                      |
| CPC          | CPC daily rainfall        | 0.5°X 0.5°         | 1979- 2016 | Chen, M. and Xie, P. 2008. Available at: <a href="ftp://ftp.cpc.ncep.noaa.gov/precip/CPC_UNI_PRCP/GAUGE_CONUS/DOCU/Chen_et_al_2008_Daily_Gauge_Anal.pdf">ftp://ftp.cpc.ncep.noaa.gov/precip/CPC_UNI_PRCP/GAUGE_CONUS/DOCU/Chen_et_al_2008_Daily_Gauge_Anal.pdf</a> |

Table S2: The wettest and driest years of the four sub-regions during 2006-2015 (figured from the ACT model ensemble)

| Sub-regions                      | pre-monsoon season (MAM) |              | monsoon season (JJAS) |              |
|----------------------------------|--------------------------|--------------|-----------------------|--------------|
|                                  | Wettest years            | Driest years | Wettest years         | Driest years |
| Sub-region 1 (north-west region) | 2008-2011                | 2009-2014    | 2008-2009             | 2013-2014    |
| Sub-region 2 (north-east region) | 2008-2015                | 2009-2014    | 2008-2012             | 2006-2013    |
| Sub-region 3 (south-west region) | 2008-2012                | 2009-2014    | 2008-2014             | 2011-2013    |
| Sub-region 4 (south-east region) | 2008-2015                | 2009-2013    | 2008-2014             | 2011-2013    |

10

15

20

25

Table S3: The risk ratios (RR) with associated uncertainty ranges (in brackets) for four rainfall events.

| Return<br>periods | Sub-region 1 (north-west region) – pre-monsoon season |                              |                                |                                | Sub-region 2 (north-east region) – pre-monsoon season |                                |                                |                  |
|-------------------|-------------------------------------------------------|------------------------------|--------------------------------|--------------------------------|-------------------------------------------------------|--------------------------------|--------------------------------|------------------|
|                   | ACT/NAT                                               | HAPPI1.5/NAT                 | HAPPI2.0/NAT                   | GHG/ACT                        | ACT/NAT                                               | HAPPI1.5/NAT                   | HAPPI2.0/NAT                   | GHG/ACT          |
| 10<br>years       | 1.1<br>(0.9-1.2)                                      | 1.5<br>(1.2-1.6)             | 1.8<br>(1.5-2.0)               | 1.4<br>(1.2-1.6)               | 1.6<br>(1.3-1.9)                                      | 1.9<br>(1.5-2.3)               | 2.5<br>(2.0-2.9)               | 1.1<br>(1.0-1.2) |
| 20<br>years       | 1.2<br>(0.9-1.5)                                      | 2.1<br>(1.6-2.8)             | 2.5<br>(1.9-3.4)               | 1.9<br>(1.6-2.2)               | 1.5<br>(1.2-2.0)                                      | 2.1<br>(1.6-2.8)               | 3<br>(2.2-3.9)                 | 1.4<br>(1.0-1.9) |
| 50<br>years       | 1.1<br>(0.7-1.5)                                      | 2.5<br>(1.8-3.8)             | 3.1<br>(2.0-4.5)               | 2.5<br>(1.9-3.8)               | 1.7<br>(1.1-2.2)                                      | 2.4<br>(1.7-3.4)               | 2.8<br>(1.9-4.0)               | 1.2<br>(0.9-1.9) |
| 100<br>years      | 1.1<br>(0.6-2.1)                                      | <b>4</b><br><b>(2.0-7.0)</b> | <b>3.9</b><br><b>(2.1-6.8)</b> | <b>3.3</b><br><b>(1.9-5.9)</b> | 1.9<br>(1.1-3.1)                                      | <b>3.2</b><br><b>(2.0-5.3)</b> | 2.9<br>(1.9-4.5)               | 1.9<br>(1.0-3.2) |
| Return<br>periods | Sub-region 3 (south-west region) – pre-monsoon season |                              |                                |                                | Sub-region 4 (south-east region) – pre-monsoon season |                                |                                |                  |
|                   | ACT/NAT                                               | HAPPI1.5/NAT                 | HAPPI2.0/NAT                   | GHG/ACT                        | ACT/NAT                                               | HAPPI1.5/NAT                   | HAPPI2.0/NAT                   | GHG/ACT          |
| 10<br>years       | 1<br>(0.9-1.1)                                        | 1.1<br>(1.0-1.3)             | 1.4<br>(1.2-1.6)               | 1.1<br>(1.0-1.3)               | 1.1<br>(1.0-1.3)                                      | 1.4<br>(1.2-1.5)               | 1.5<br>(1.3-1.6)               | 1.3<br>(1.0-1.5) |
| 20<br>years       | 1.1<br>(0.9-1.2)                                      | 1.3<br>(1.1-1.8)             | 1.6<br>(1.3-2.1)               | 1.2<br>(0.9-1.4)               | 1.3<br>(1.0-1.6)                                      | 1.9<br>(1.3-2.3)               | 1.7<br>(1.2-2.1)               | 1.4<br>(1.0-1.6) |
| 50<br>years       | 1.2<br>(0.9-1.8)                                      | 1.5<br>(1.2-2.1)             | 2.5<br>(1.9-3.8)               | 1.5<br>(1.0-2.0)               | 2.1<br>(1.4-3.0)                                      | 2.2<br>(1.5-3.2)               | 2.2<br>(1.6-3.2)               | 1.6<br>(1.0-2.2) |
| 100<br>years      | 1.5<br>(0.9-2.8)                                      | 2<br>(1.0-3.0)               | <b>3.1</b><br><b>(1.9-5.2)</b> | 1.5<br>(0.9-2.4)               | 1.7<br>(0.9-2.9)                                      | 2.5<br>(1.6-4.0)               | 2.1<br>(1.2-3.3)               | 1.7<br>(0.9-2.3) |
| Return<br>periods | Sub-region 1 (north-west region) – monsoon season     |                              |                                |                                | Sub-region 2 (north-east region) – monsoon season     |                                |                                |                  |
|                   | ACT/NAT                                               | HAPPI1.5/NAT                 | HAPPI2.0/NAT                   | GHG/ACT                        | ACT/NAT                                               | HAPPI1.5/NAT                   | HAPPI2.0/NAT                   | GHG/ACT          |
| 10<br>years       | 1.7<br>(1.5-2.0)                                      | 2.5<br>(2.1-2.9)             | 2.3<br>(2.0-2.6)               | 1.3<br>(1.0-1.5)               | 1.8<br>(1.5-2.1)                                      | 2.5<br>(2.1-3.1)               | 3.1<br>(2.6-4.0)               | 1.1<br>(1.0-1.2) |
| 20<br>years       | 2.3<br>(1.9-2.9)                                      | 3.7<br>(2.9-4.5)             | 3.2<br>(2.5-4.0)               | 1.5<br>(1.1-1.9)               | 1.5<br>(1.1-1.9)                                      | 2.2<br>(1.8-2.9)               | 2.9<br>(2.2-3.8)               | 1.1<br>(0.9-1.2) |
| 50<br>years       | 2.1<br>(1.5-2.9)                                      | 3.8<br>(2.8-4.9)             | 3.3<br>(2.6-4.6)               | 1.5<br>(1.1-2.1)               | 1.3<br>(0.9-1.9)                                      | 2.1<br>(1.5-3.0)               | 3.2<br>(2.2-4.8)               | 1.5<br>(1.0-1.9) |
| 100<br>years      | 1.6<br>(1.0-2.5)                                      | <b>4</b><br><b>(2.5-6.3)</b> | <b>3.8</b><br><b>(2.3-6.0)</b> | 2<br>(1.2-3.7)                 | 1.8<br>(1.0-3.0)                                      | <b>3</b><br><b>(1.0-4.0)</b>   | <b>4.6</b><br><b>(2.9-7.2)</b> | 1.8<br>(1.0-2.9) |
| Return<br>periods | Sub-region 3 (south-west region) – monsoon season     |                              |                                |                                | Sub-region 4 (south-east region) – monsoon season     |                                |                                |                  |
|                   | ACT/NAT                                               | HAPPI1.5/NAT                 | HAPPI2.0/NAT                   | GHG/ACT                        | ACT/NAT                                               | HAPPI1.5/NAT                   | HAPPI2.0/NAT                   | GHG/ACT          |
| 10<br>years       | 1.6<br>(1.4-1.9)                                      | 1.5<br>(1.3-1.7)             | 2<br>(1.7-2.2)                 | 1<br>(0.8-1.2)                 | 1.9<br>(1.6-2.1)                                      | 2.1<br>(1.9-2.5)               | 2.3<br>(2.0-2.8)               | 1<br>(0.9-1.2)   |
| 20<br>years       | 2<br>(1.8-2.2)                                        | 1.9<br>(1.4-2.3)             | 2.5<br>(2.0-3.0)               | 1.1<br>(0.8-1.8)               | 2<br>(1.5-2.5)                                        | 2.3<br>(1.8-2.8)               | 2.9<br>(2.2-3.8)               | 1.1<br>(0.9-1.5) |
| 50<br>years       | 2.1<br>(1.7-2.5)                                      | 1.9<br>(1.2-2.6)             | 2.1<br>(1.5-2.8)               | 1.2<br>(0.7-1.9)               | 2.5<br>(1.9-3.5)                                      | 2.6<br>(1.9-3.7)               | 3.9<br>(2.9-5.5)               | 0.9<br>(0.5-1.2) |
| 100<br>years      | 2.2<br>(1.6-3.1)                                      | 2.3<br>(1.3-3.6)             | 2.2<br>(1.3-3.8)               | 1.3<br>(0.5-2.2)               | <b>3.9</b><br><b>(2.6-5.8)</b>                        | <b>4.1</b><br><b>(2.2-5.3)</b> | <b>5.5</b><br><b>(3.5-7.8)</b> | 0.9<br>(0.3-1.8) |

\*\*\* RR&gt;2.9 is highlighted with bold font for the 1 in 100 year event.

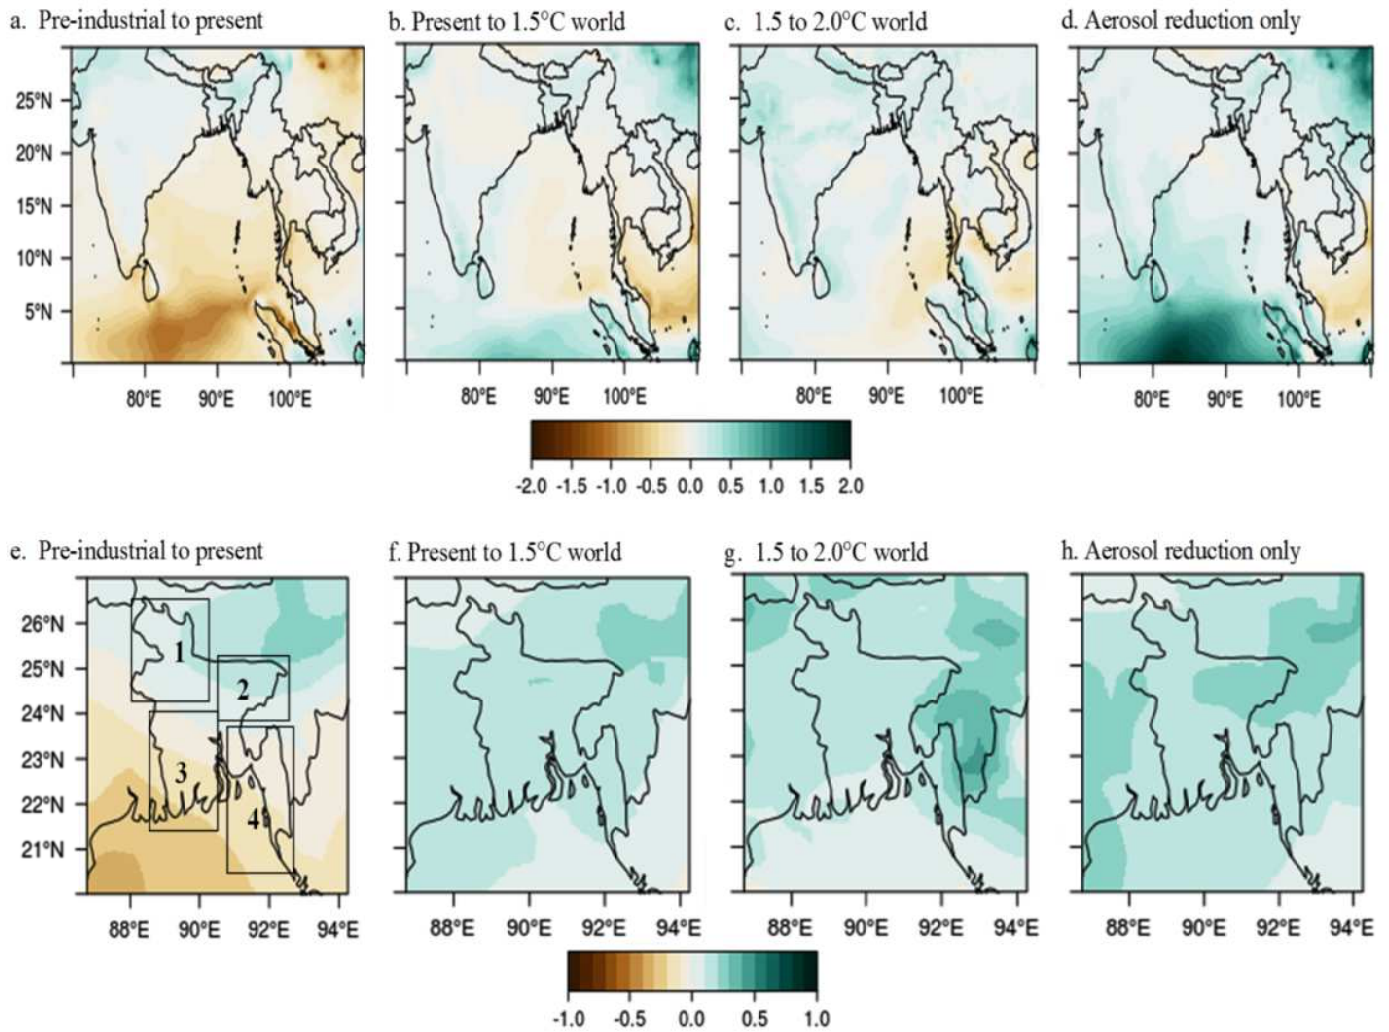

**Figure S1. Relative changes in the SPI of pre-monsoon (MAM) seasonal mean rainfall between different forcing scenarios. The top row**  
**10 (panels a-d) shows the regional SPI over central parts of the South Asia (SA) while, bottom row (panels e-h) shows the SPI over**  
**Bangladesh. The four boxes (1-4) on top of the panel e approximately represent the four sub-regions of Bangladesh. These four sub-**  
**regions (1-4) are used later for the relative quantification of risks of extreme monsoon rainfall events. a. present day rainfall PC relative**  
**to natural pre-industrial climate over SA b. present day rainfall PC relative to 1.5°C world over SA c. 1.5°C world rainfall PC relative**  
**to 2.0°C world over SA d. present day rainfall PC relative to GHG only climate over SA.**

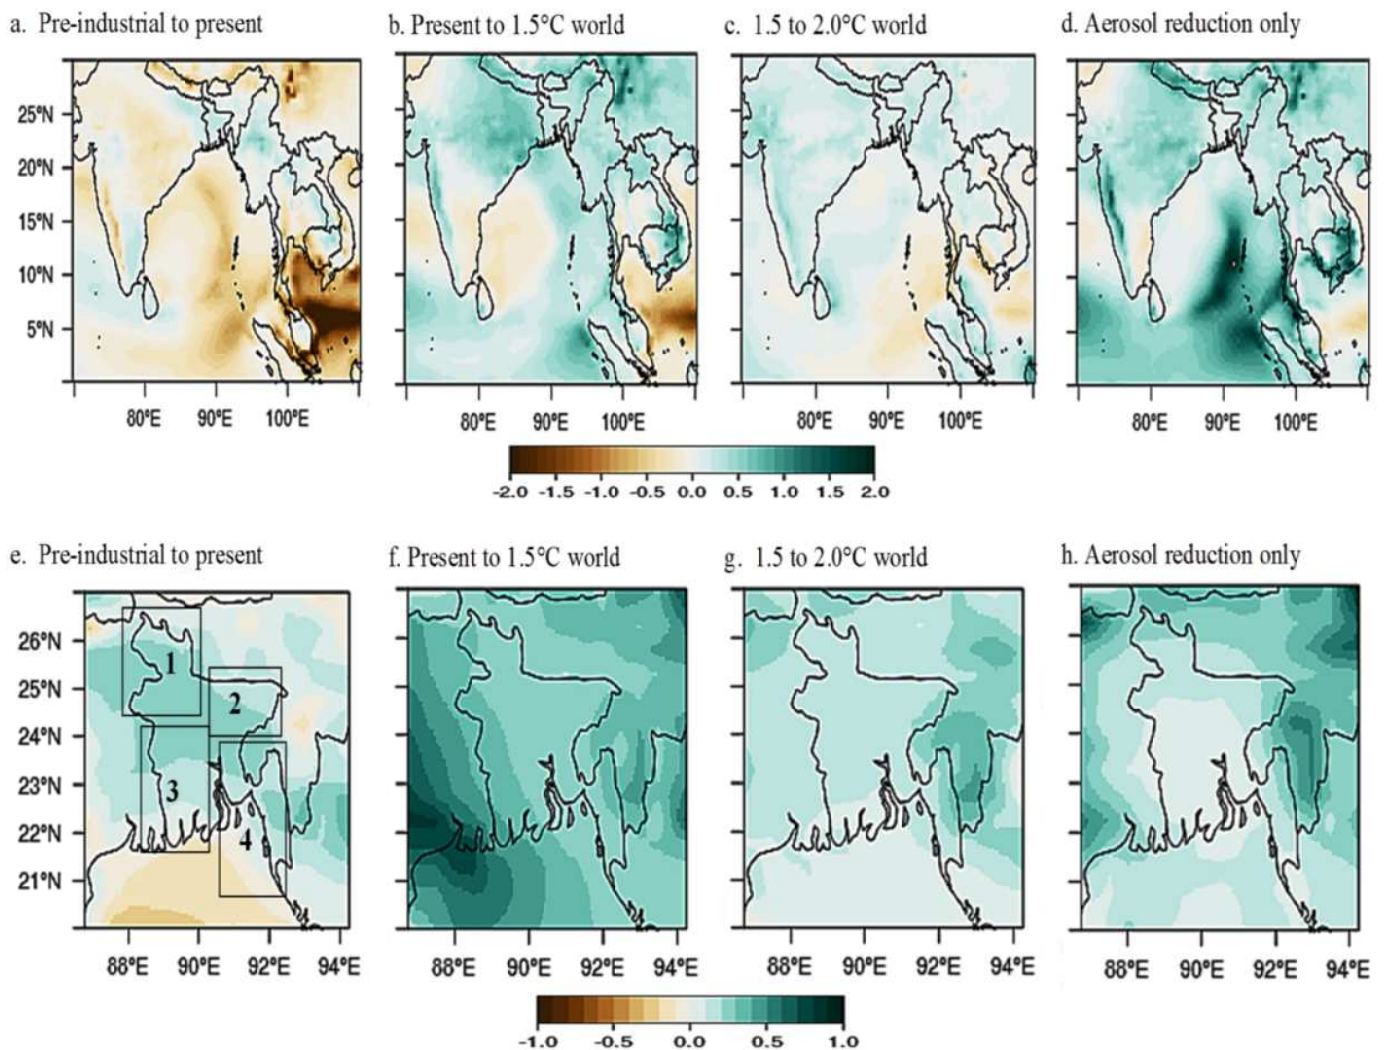

Figure S2. Relative changes in the SPI of monsoon (JJAS) seasonal mean rainfall between different forcing scenarios. The top row (panels a-d) shows the regional SPI over central parts of the South Asia (SA) while, bottom row (panels e-h) shows the SPI over Bangladesh. The four boxes (1-4) on top of the panel e approximately represent the four sub-regions of Bangladesh. These four sub-regions (1-4) are used later for the relative quantification of risks of extreme monsoon rainfall events. a. present day rainfall PC relative to natural pre-industrial climate over SA b. present day rainfall PC relative to 1.5°C world over SA c. 1.5°C world rainfall PC relative to 2.0°C world over SA d. present day rainfall PC relative to GHG only climate over SA. The figure shows that the apparently non-linear response between panels of a, b, and c (or, e, f, g) can be explained by the response for aerosols in the panel d (or, h).



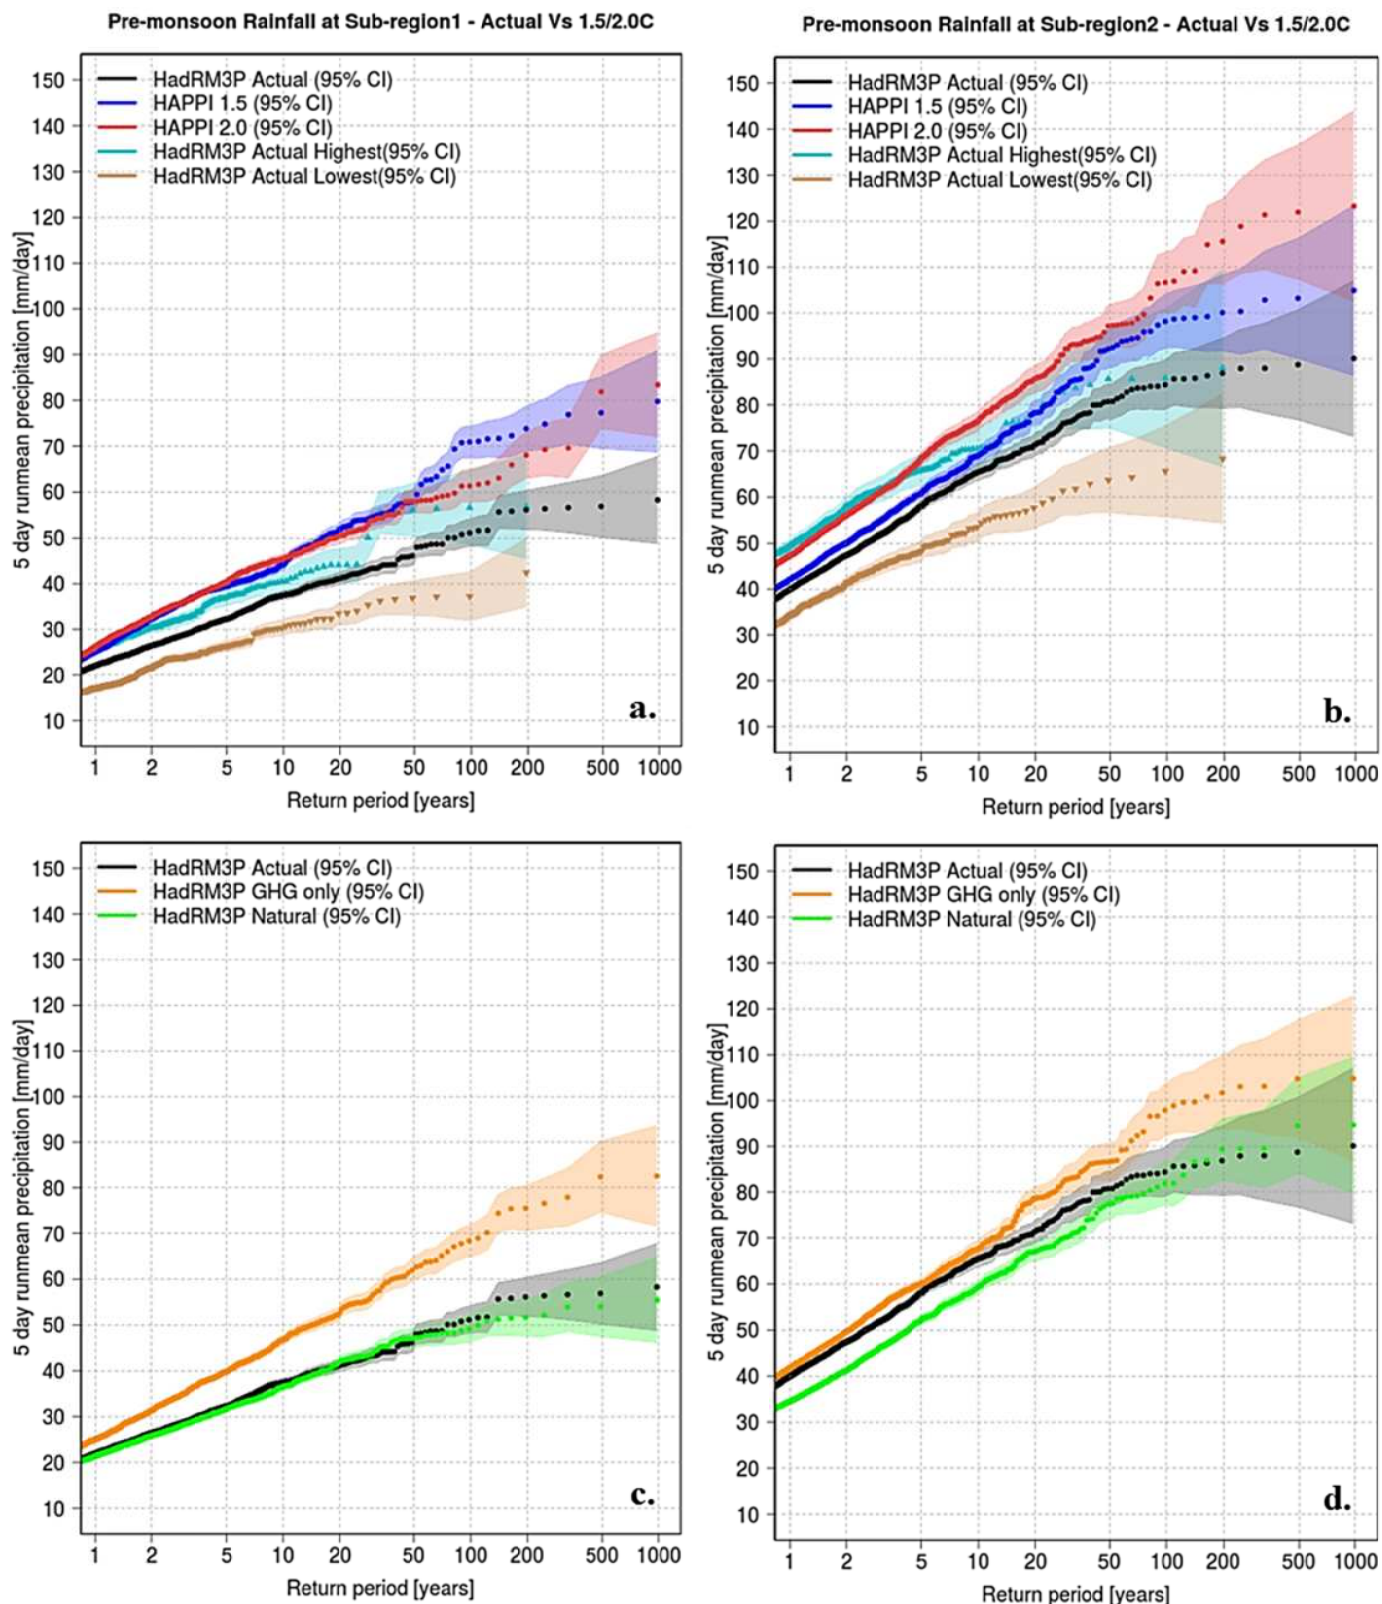

Figure S3. Return time plots for five day mean rainfall during pre-monsoon (MAM) season in different forcing scenarios over the sub-regions of 1 and 2 of Bangladesh. The HadRM3P ACT (black), ACT highest (upper grey with upward triangles), ACT lowest (lower grey with downward triangles), NAT (green) and GHG (orange) ensembles are compared with the HAPPI 1.5 (blue) and 2.0 (red) ensembles.

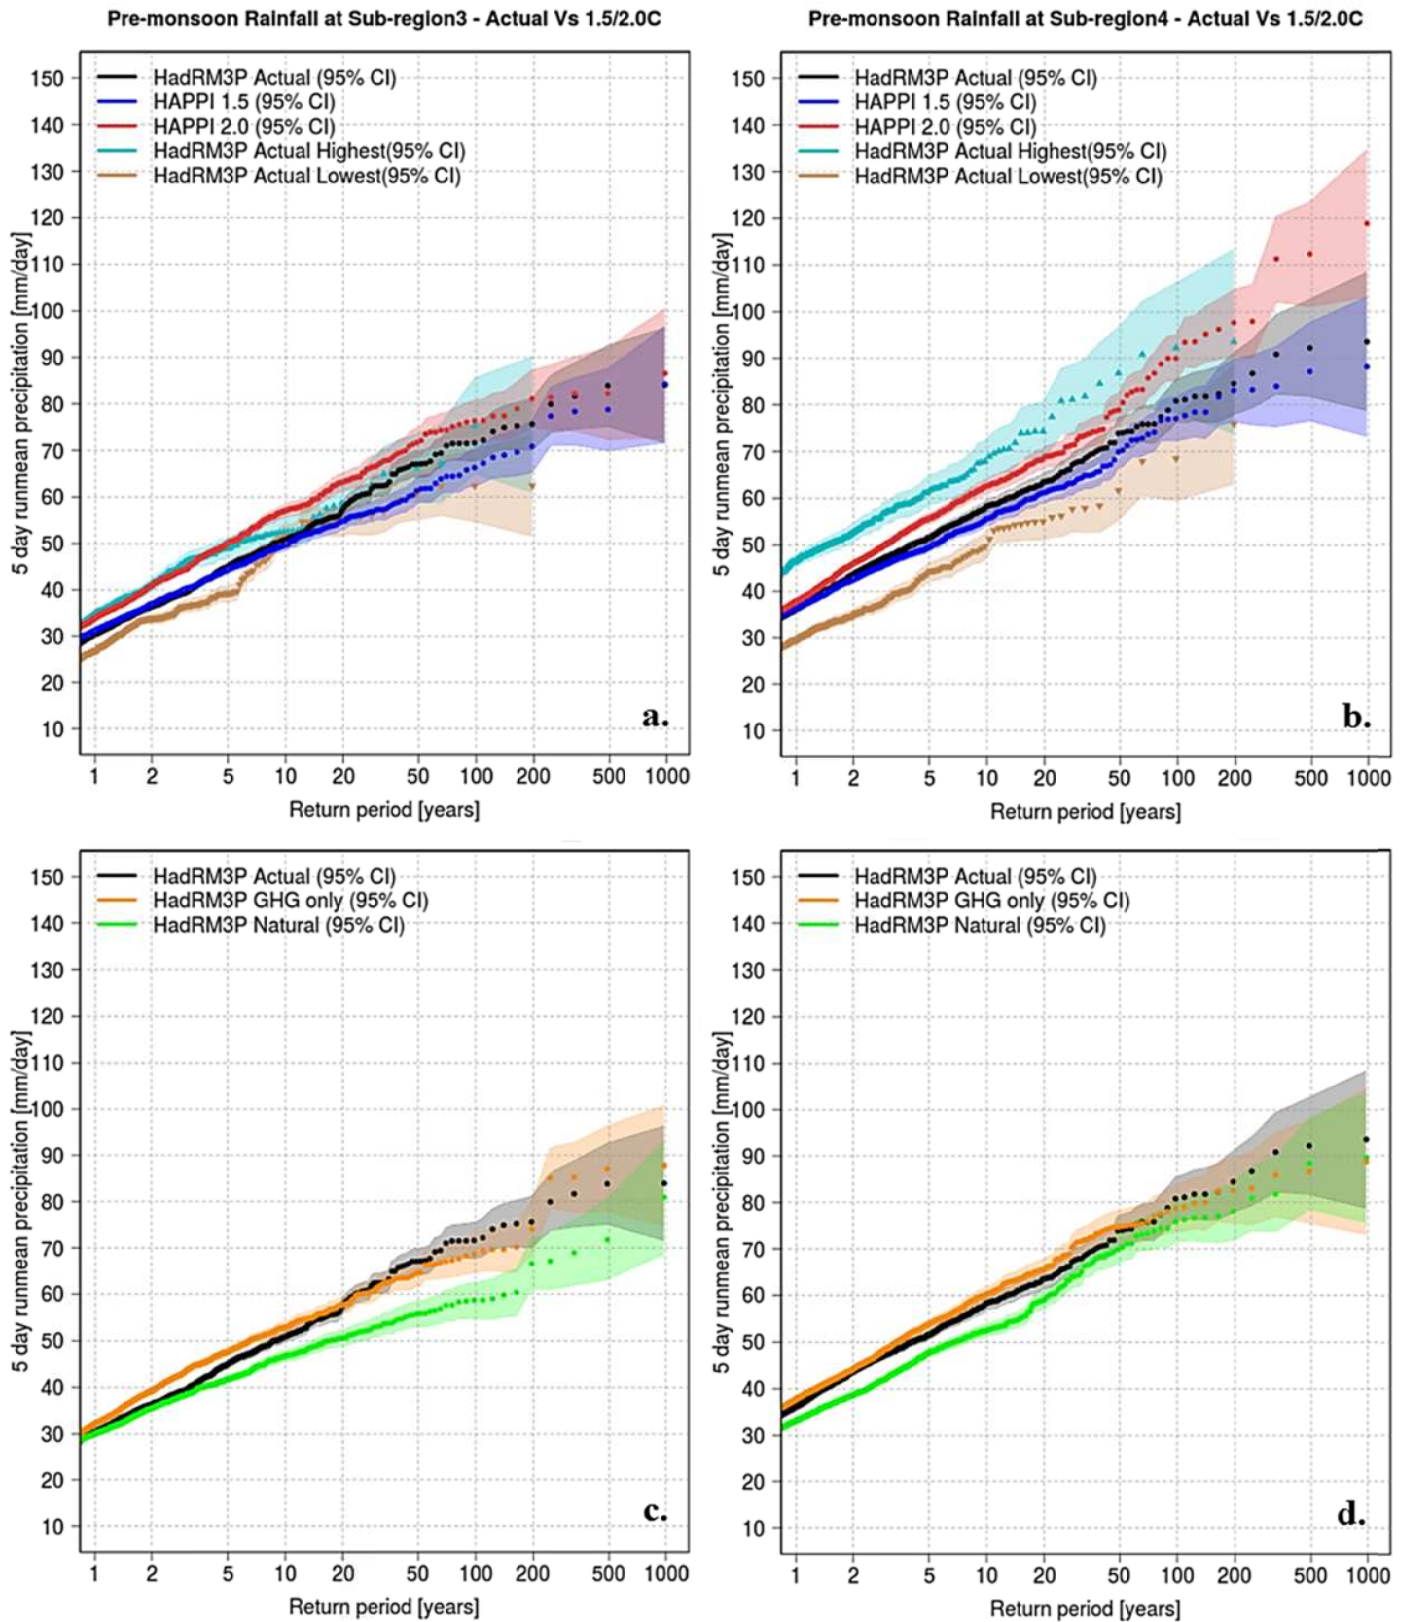

Figure S4. Same as Fig S3 but showing return time plots for five day mean rainfall during pre-monsoon (MAM) season in different forcing scenarios over the sub-regions of 3 and 4 of Bangladesh.

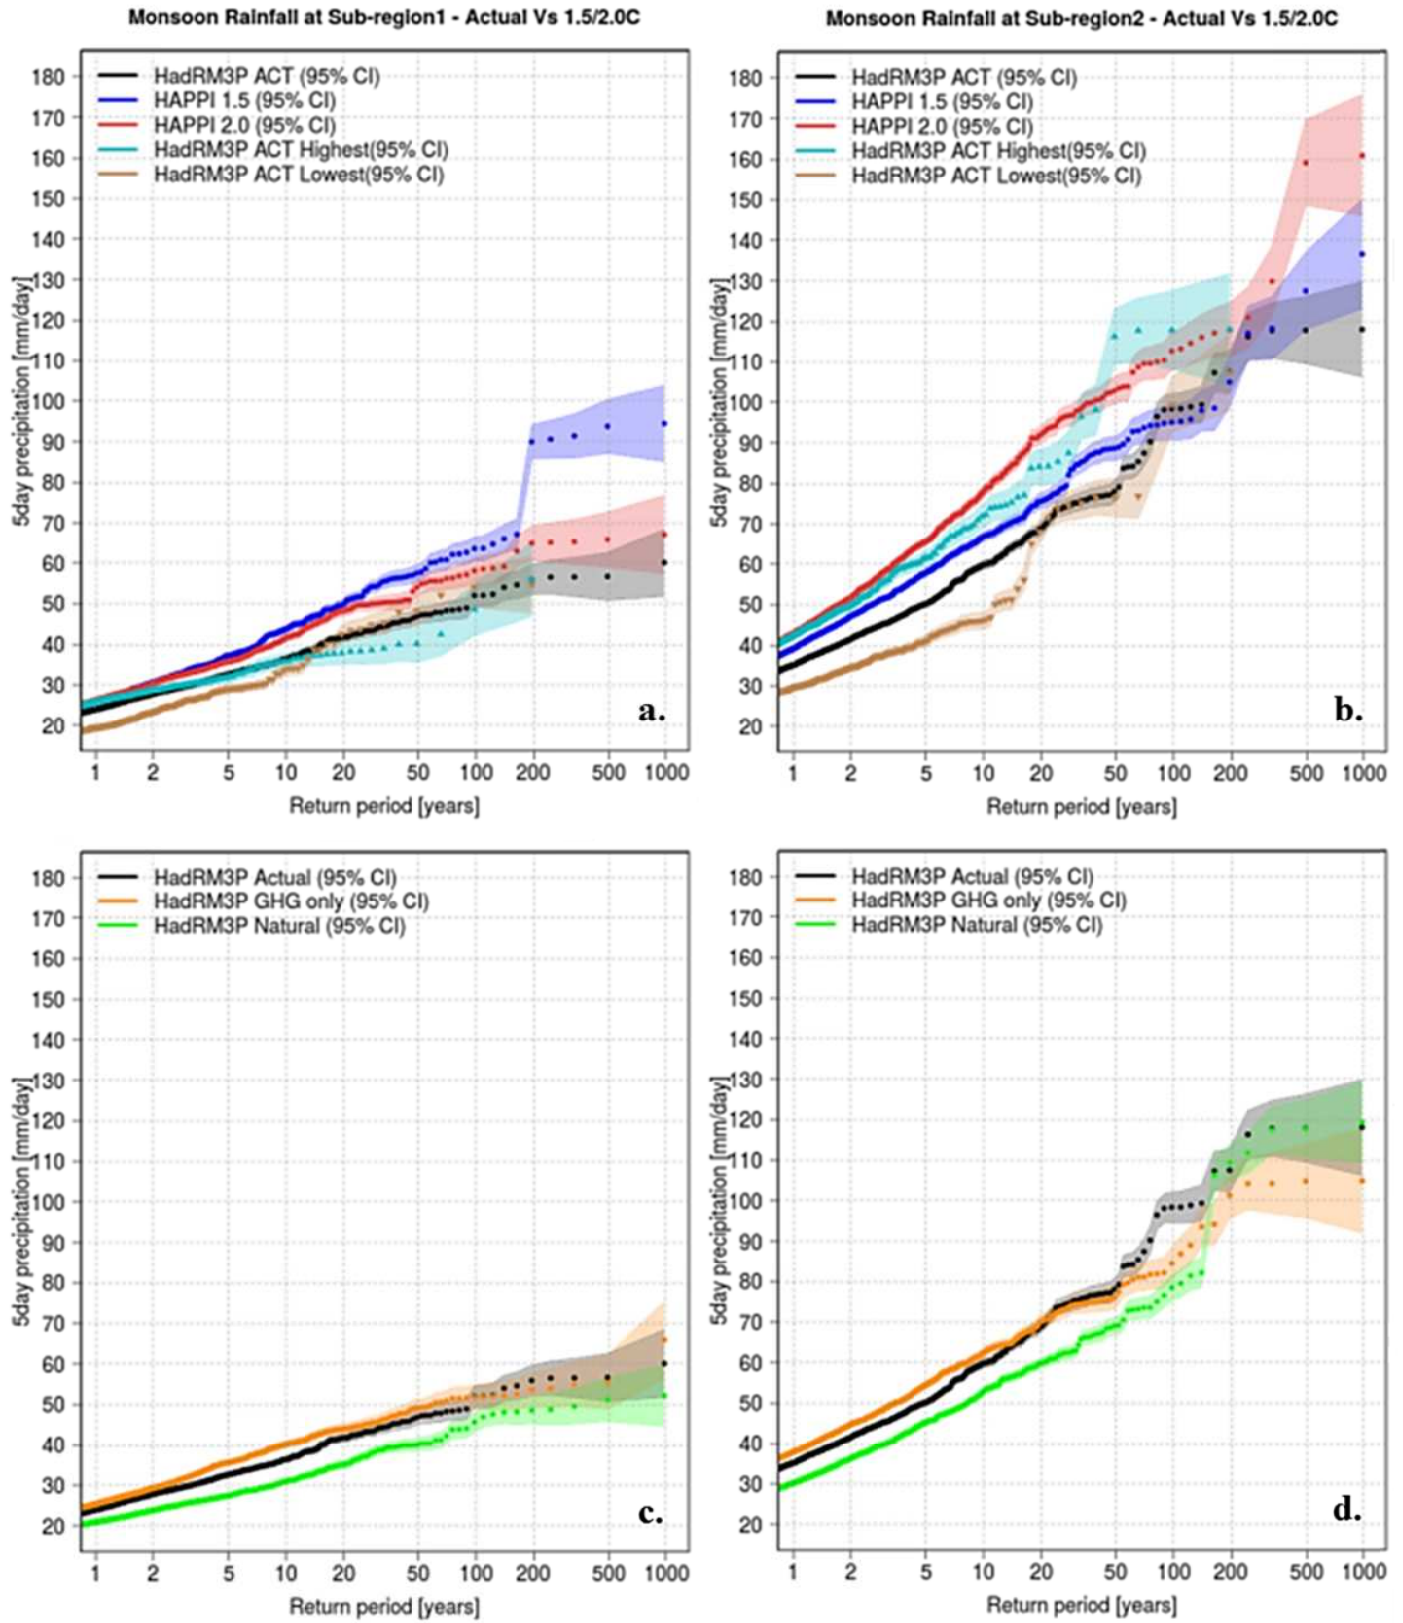

Figure S5. Return time plots for five day mean rainfall during monsoon (JJAS) season in different forcing scenarios over the four sub-regions of Bangladesh. The HadRM3P ACT (black), ACT highest (upper grey with upward triangles), ACT lowest (lower grey with downward triangles), NAT (green) and GHG (orange) ensembles are compared with the HAPPI 1.5 (blue) and 2.0 (red) ensembles. The risks of extreme rainfall events are evidently increasing between different forcing scenarios over sub-region 2.



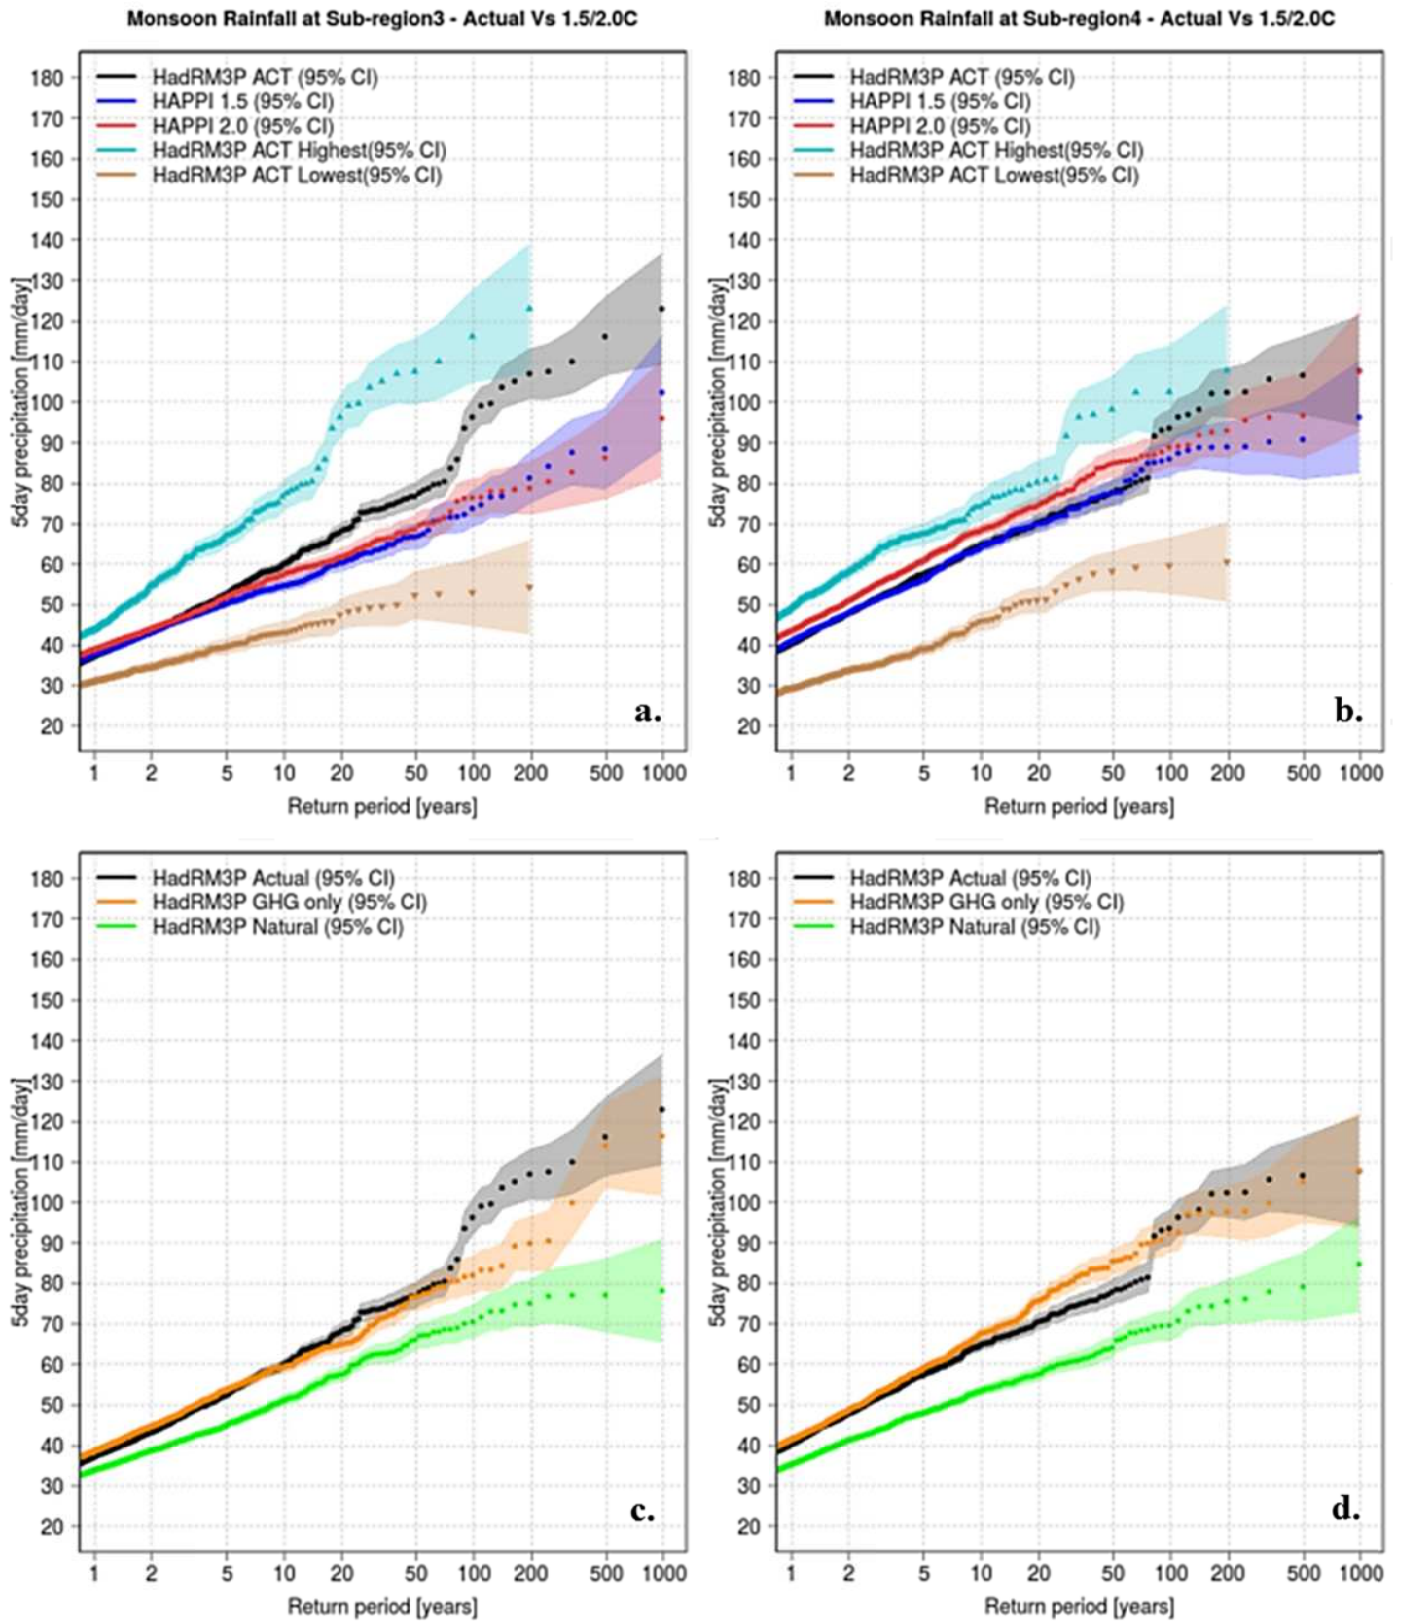

Figure S6. Same as Fig S5 but showing return time plots for five day mean rainfall during monsoon (JJAS) season in different forcing scenarios over the sub-regions of 3 and 4 of Bangladesh.
